# Supplementary material for: Photostability challenges of catechol-derived LMCT complexes on TiO 2 for visible-light-driven photocatalytic air purification
Source: Royal Society of Chemistry journal article supplement (doi:10.1039/d5nj03900b), 2025-01-01
Supplement: d5nj03900b1.pdf [file d5nj03900b1.pdf]

# Supplementary Information

## **Photostability challenges of catechol-derived LMCT complexes on TiO<sub>2</sub> for visible-light-driven photocatalytic air purification**

Tae Hyeon Kim<sup>†</sup>, Seung Ho Kang<sup>†</sup>, Hyun Ook Seo<sup>†\*</sup>

<sup>†</sup> Department of Chemistry and Energy Engineering, Sangmyung University  
Seoul, 03016 Republic of Korea

\*Corresponding authors.

E-mail address: hyun.ook.seo@smu.ac.kr (H.O. Seo)

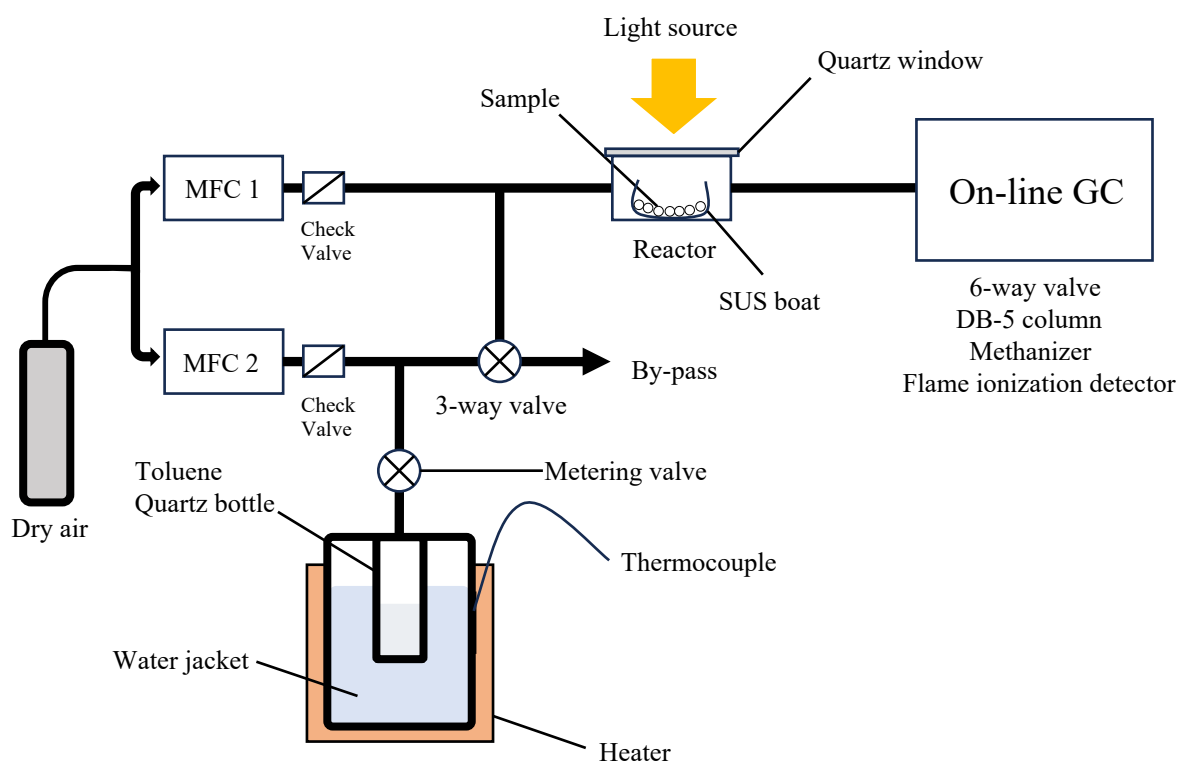

Figure S1. The experimental set-up for photostability and photocatalytic activity measurements.

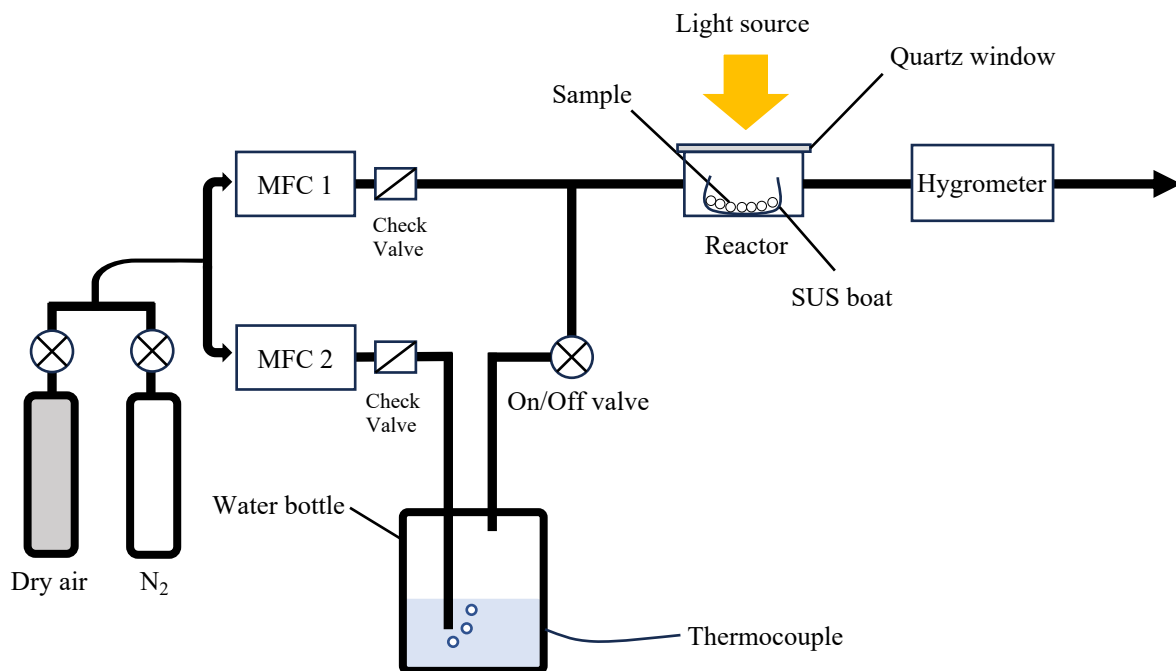

Figure S2. The experimental set-up for photostability tests under various conditions (dry air, humid air, dry N<sub>2</sub>, and humid N<sub>2</sub>).

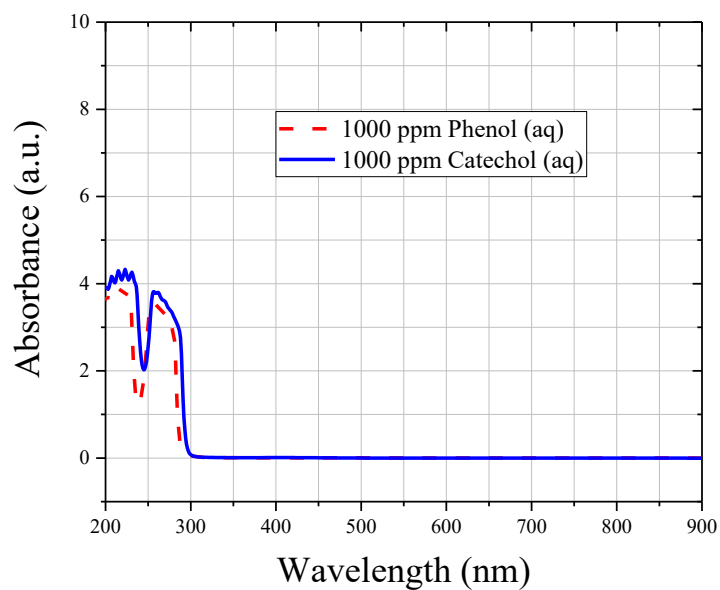

Figure S3. UV-vis absorption spectra of phenol and catechol solutions (1000 ppm).

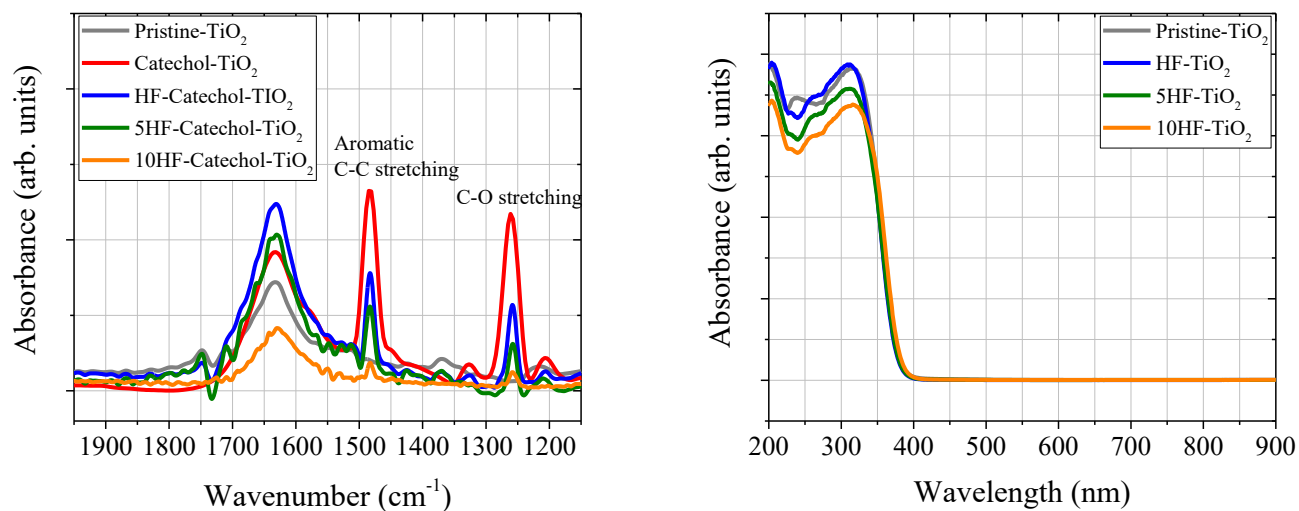

Figure S4. FT-IR spectra of pristine-TiO<sub>2</sub>, catechol-TiO<sub>2</sub>, HF-Catechol-TiO<sub>2</sub>, 5HF-Catechol-TiO<sub>2</sub>, and 10HF-Catechol-TiO<sub>2</sub> (Left) and UV-DRS spectra of pristine-TiO<sub>2</sub>, HF-TiO<sub>2</sub>, 5HF-TiO<sub>2</sub>, and 10HF-TiO<sub>2</sub> (Right).

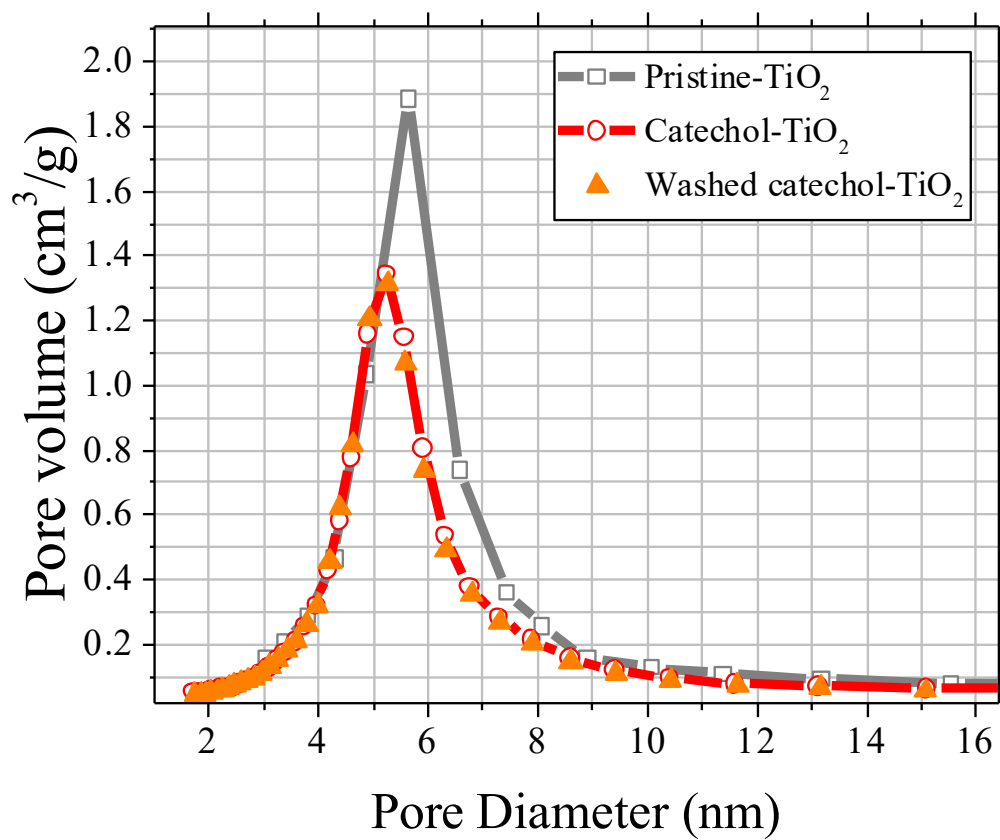

Figure S5. The BJH pore size distributions of pristine-TiO<sub>2</sub>, catechol-TiO<sub>2</sub>, and washed catechol-TiO<sub>2</sub>.

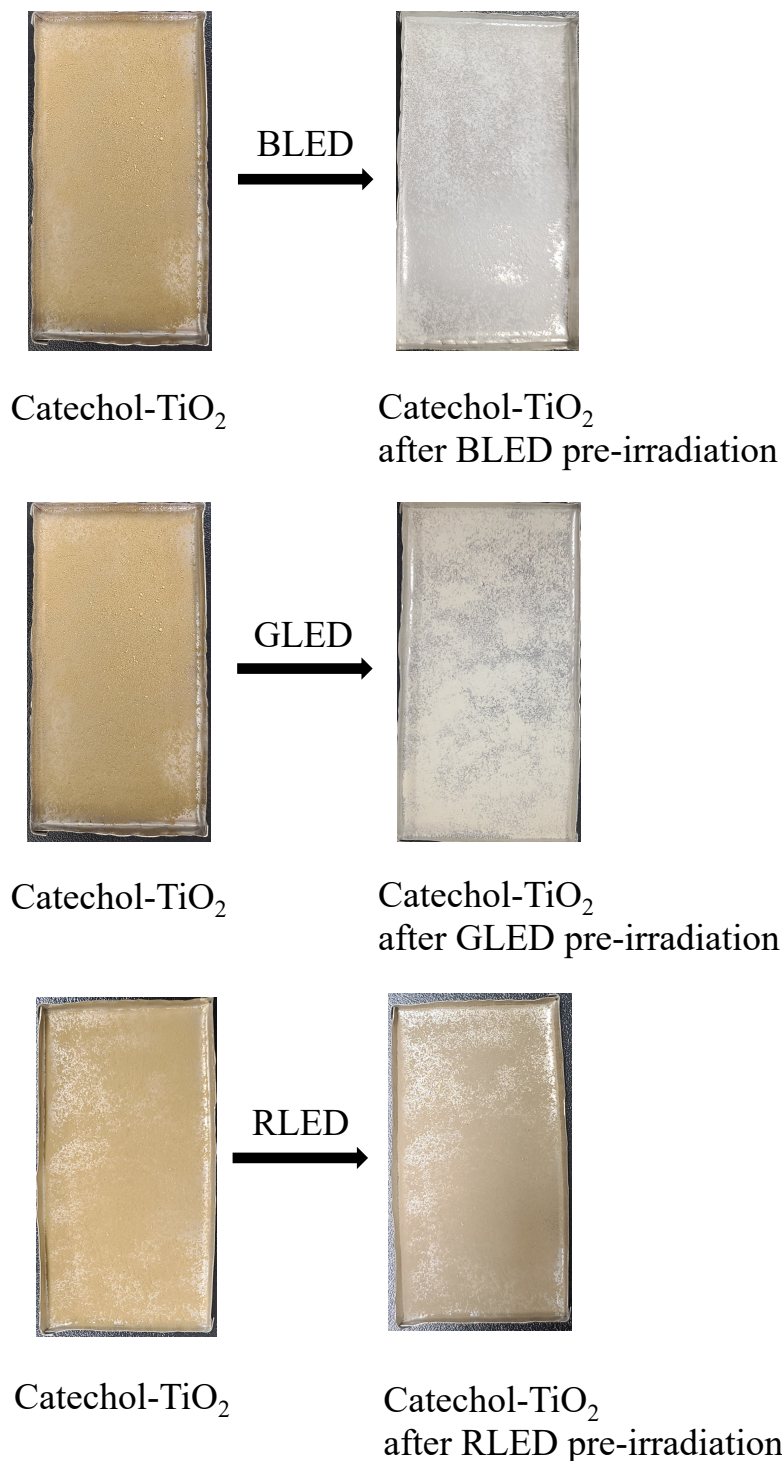

Figure S6. The photos of catechol-TiO<sub>2</sub> taken before and after 6000 minutes of pre-irradiation of blue (top), green (middle), and red (bottom) lights, showing the changes of sample colors after the pre-irradiation.

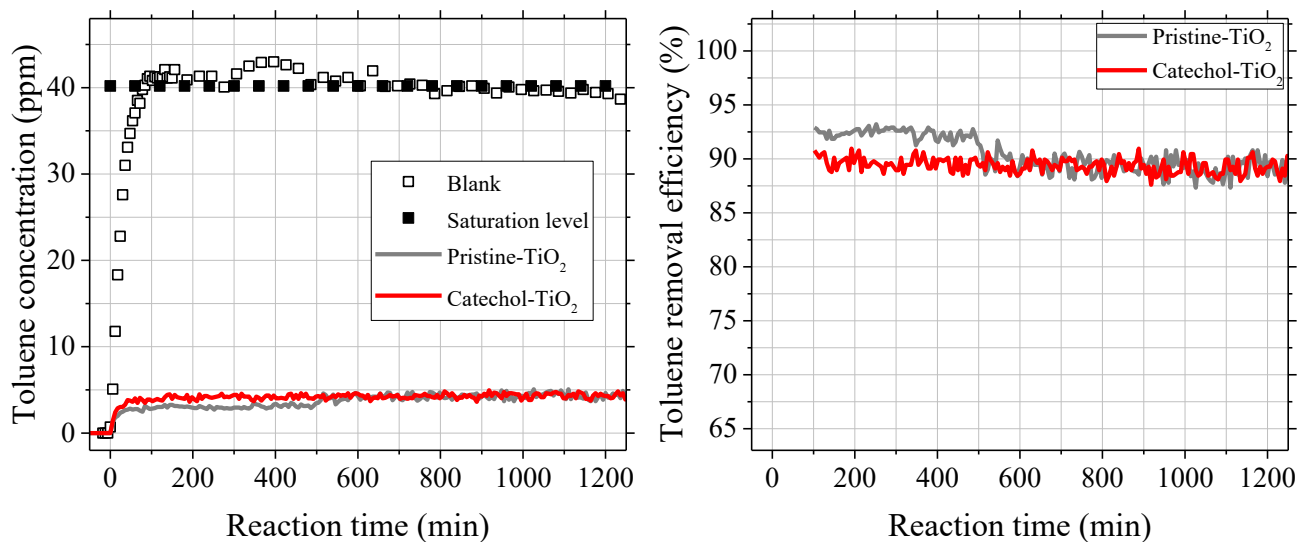

Figure S7. The changes of toluene concentration (Left) and toluene removal efficiency% (Right) in the absence of TiO<sub>2</sub> (blank) and in the presence of pristine-TiO<sub>2</sub> and catechol-TiO<sub>2</sub> under blue light.



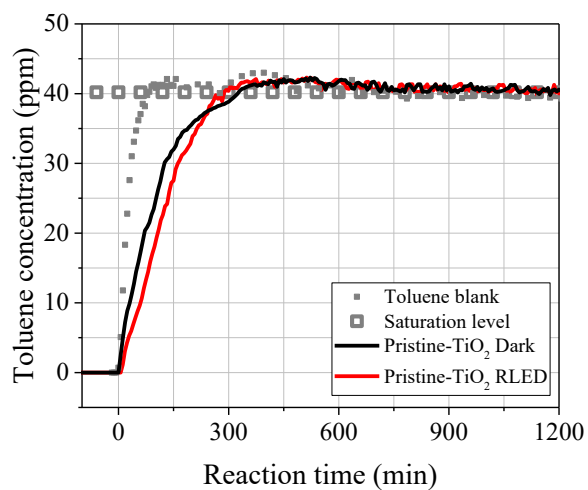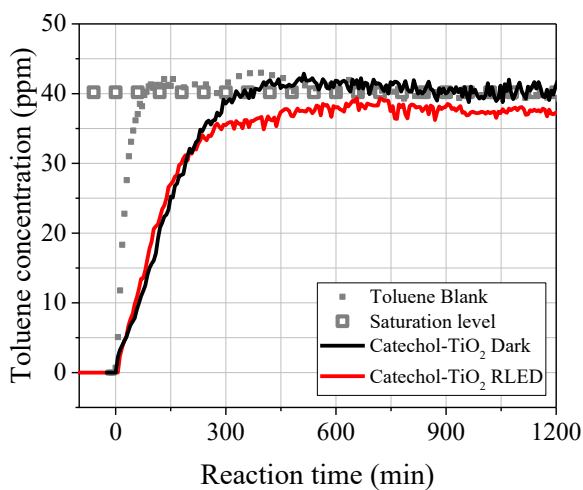

Figure S8. The changes of toluene concentration in the absence of TiO<sub>2</sub> (Toluene blank) and in the presence of pristine-TiO<sub>2</sub> (Left) and catechol-TiO<sub>2</sub> (Right) under dark and red light.
